# Supplementary material
Source: publisher figshare collection journal article supplement (https://tandf.figshare.com/articles/dataset/_/21201649)
Supplement: Supplementary file 1 [file 1]

## Sheet: Supplemental_Table3
Supplemental Table 3. Adjusted odds ratios from ordered logistic regressions estimating associations between legal permissiveness of cannabis context and favorable attitudes toward substance use ("How wrong would it be for someone your age to…").
		Use cannabis			Use alcohol			Use cigarettes			Sell cannabis			Sell other drugs
Predictors		Model 1	Model 2	Model 3	Model 1	Model 2	Model 3	Model 1	Model 2	Model 3	Model 1	Model 2	Model 3	Model 1	Model 2	Model 3
Permissiveness of cannabis context		1.22**	1.24**	1.16*	0.96	0.96	0.91	0.98	0.99	0.96	1.31***	1.33***	1.28**	1.18	1.19	1.09
		(1.07 - 1.40)	(1.08 - 1.42)	(1.00 - 1.36)	(0.84 - 1.10)	(0.84 - 1.10)	(0.79 - 1.05)	(0.86 - 1.13)	(0.86 - 1.14)	(0.84 - 1.11)	(1.13 - 1.52)	(1.15 - 1.55)	(1.10 - 1.50)	(0.99 - 1.41)	(1.00 - 1.43)	(0.91 - 1.31)
	d849875	0.87	0.70	0.80	1.10	1.01	1.04	1.96	1.65	1.72	0.60	0.44	0.44	0.61	0.53	0.52
		(0.41 - 1.84)	(0.32 - 1.51)	(0.34 - 1.86)	(0.52 - 2.30)	(0.48 - 2.14)	(0.48 - 2.25)	(0.94 - 4.10)	(0.77 - 3.53)	(0.80 - 3.71)	(0.26 - 1.38)	(0.19 - 1.05)	(0.17 - 1.11)	(0.23 - 1.67)	(0.19 - 1.48)	(0.18 - 1.55)
	d1751180	1.56	1.25	1.17	1.27	1.19	1.11	1.05	0.86	0.85	1.18	0.89	0.89	1.11	0.99	0.95
		(0.95 - 2.55)	(0.75 - 2.11)	(0.67 - 2.05)	(0.79 - 2.05)	(0.72 - 1.96)	(0.67 - 1.86)	(0.63 - 1.76)	(0.50 - 1.48)	(0.49 - 1.47)	(0.70 - 1.99)	(0.51 - 1.55)	(0.50 - 1.61)	(0.61 - 2.03)	(0.52 - 1.88)	(0.49 - 1.86)
	d2021275	1.82***	1.60**	1.66**	1.52*	1.44*	1.44*	1.27	1.08	1.09	1.34	1.15	1.10	0.79	0.70	0.64
		(1.32 - 2.52)	(1.15 - 2.24)	(1.17 - 2.37)	(1.11 - 2.10)	(1.04 - 2.00)	(1.03 - 2.00)	(0.90 - 1.77)	(0.76 - 1.52)	(0.76 - 1.54)	(0.95 - 1.90)	(0.80 - 1.65)	(0.75 - 1.62)	(0.51 - 1.21)	(0.44 - 1.09)	(0.40 - 1.03)
	d2363590	1.43	1.07	0.96	1.77*	1.54	1.55	1.66	1.12	1.09	0.71	0.48*	0.37**	0.44	0.36*	0.33*
		(0.81 - 2.54)	(0.59 - 1.95)	(0.51 - 1.84)	(1.00 - 3.12)	(0.85 - 2.78)	(0.85 - 2.82)	(0.90 - 3.05)	(0.59 - 2.13)	(0.57 - 2.08)	(0.38 - 1.32)	(0.25 - 0.92)	(0.18 - 0.75)	(0.19 - 1.04)	(0.15 - 0.88)	(0.13 - 0.83)
	d2386480	1.36	1.12	0.97	1.46	1.36	1.35	1.57	1.33	1.29	1.01	0.79	0.71	0.79	0.72	0.72
		(0.79 - 2.34)	(0.64 - 1.98)	(0.52 - 1.81)	(0.83 - 2.57)	(0.75 - 2.45)	(0.74 - 2.46)	(0.90 - 2.77)	(0.73 - 2.41)	(0.71 - 2.36)	(0.56 - 1.82)	(0.43 - 1.47)	(0.37 - 1.38)	(0.38 - 1.65)	(0.33 - 1.57)	(0.32 - 1.60)
	d4117700	3.56***	2.81***	2.80**	1.60	1.50	1.36	1.79*	1.25	1.18	1.53	1.07	0.82	0.63	0.51	0.43*
		(2.10 - 6.05)	(1.61 - 4.90)	(1.51 - 5.20)	(0.96 - 2.64)	(0.88 - 2.54)	(0.79 - 2.34)	(1.06 - 3.04)	(0.72 - 2.19)	(0.68 - 2.07)	(0.88 - 2.66)	(0.60 - 1.92)	(0.45 - 1.51)	(0.32 - 1.25)	(0.25 - 1.05)	(0.21 - 0.89)
	d4164600	2.54***	1.90*	1.85*	2.04**	1.84*	1.65	2.19**	1.58	1.45	1.51	1.03	0.91	0.86	0.70	0.63
		(1.50 - 4.31)	(1.09 - 3.29)	(1.01 - 3.39)	(1.21 - 3.45)	(1.07 - 3.16)	(0.95 - 2.86)	(1.28 - 3.73)	(0.90 - 2.77)	(0.82 - 2.54)	(0.86 - 2.65)	(0.58 - 1.86)	(0.49 - 1.67)	(0.44 - 1.69)	(0.34 - 1.41)	(0.30 - 1.29)
	d4962030	1.25	1.00	1.28	1.36	1.24	1.43	1.64*	1.34	1.46	1.10	0.85	1.01	0.85	0.75	0.85
		(0.85 - 1.82)	(0.67 - 1.50)	(0.83 - 1.96)	(0.93 - 2.00)	(0.83 - 1.87)	(0.95 - 2.15)	(1.11 - 2.42)	(0.88 - 2.04)	(0.96 - 2.23)	(0.73 - 1.66)	(0.54 - 1.32)	(0.63 - 1.61)	(0.52 - 1.39)	(0.44 - 1.29)	(0.48 - 1.49)
	d4965110	1.30	0.95	0.91	1.12	0.98	0.97	1.24	0.84	0.85	1.22	0.84	0.79	0.83	0.66	0.62*
		(0.97 - 1.73)	(0.69 - 1.32)	(0.64 - 1.28)	(0.84 - 1.49)	(0.71 - 1.35)	(0.70 - 1.34)	(0.92 - 1.68)	(0.59 - 1.18)	(0.60 - 1.20)	(0.89 - 1.66)	(0.59 - 1.19)	(0.54 - 1.15)	(0.57 - 1.20)	(0.43 - 1.01)	(0.40 - 0.97)
	d5300100	2.33**	1.78*	1.70	1.83*	1.68*	1.58	2.08**	1.54	1.42	1.12	0.79	0.61	0.69	0.59	0.50*
		(1.41 - 3.86)	(1.06 - 3.00)	(0.96 - 3.01)	(1.11 - 3.01)	(1.01 - 2.81)	(0.93 - 2.66)	(1.25 - 3.47)	(0.90 - 2.61)	(0.83 - 2.43)	(0.65 - 1.92)	(0.45 - 1.39)	(0.34 - 1.11)	(0.36 - 1.33)	(0.30 - 1.16)	(0.25 - 0.99)
	d5348820	1.26	1.02	1.30	1.29	1.22	1.32	1.16	0.91	0.99	0.85	0.62	0.67	0.44	0.39*	0.41
		(0.67 - 2.37)	(0.53 - 1.97)	(0.65 - 2.60)	(0.71 - 2.35)	(0.66 - 2.27)	(0.71 - 2.47)	(0.61 - 2.22)	(0.46 - 1.77)	(0.50 - 1.94)	(0.44 - 1.65)	(0.31 - 1.24)	(0.33 - 1.38)	(0.18 - 1.08)	(0.15 - 0.98)	(0.16 - 1.08)
Race (non-White is referent)	White		1.16	1.15		1.14	1.13		1.53***	1.51**		1.16	1.15		1.09	1.08
			(0.91 - 1.46)	(0.90 - 1.48)		(0.91 - 1.44)	(0.90 - 1.43)		(1.20 - 1.95)	(1.18 - 1.93)		(0.91 - 1.48)	(0.89 - 1.49)		(0.80 - 1.47)	(0.78 - 1.48)
Ethnicity (non-Hispanic is referent)	Hispanic		0.71*	0.72*		0.93	0.98		0.83	0.86		0.64**	0.65**		0.79	0.86
			(0.54 - 0.93)	(0.54 - 0.97)		(0.71 - 1.22)	(0.75 - 1.30)		(0.62 - 1.10)	(0.64 - 1.15)		(0.48 - 0.86)	(0.47 - 0.88)		(0.55 - 1.14)	(0.58 - 1.26)
Sex (Female is referent)	Male		1.47***	1.36**		1.41***	1.35**		1.49***	1.44***		1.69***	1.63***		2.02***	1.98***
			(1.23 - 1.76)	(1.12 - 1.64)		(1.18 - 1.68)	(1.13 - 1.61)		(1.24 - 1.79)	(1.19 - 1.73)		(1.40 - 2.05)	(1.33 - 1.99)		(1.60 - 2.57)	(1.55 - 2.54)
Education (no HS is referent)	HS degree		1.09	1.20		1.52*	1.60**		0.70*	0.71*		0.88	0.95		1.07	1.13
			(0.78 - 1.51)	(0.84 - 1.71)		(1.09 - 2.10)	(1.15 - 2.23)		(0.51 - 0.97)	(0.51 - 0.98)		(0.63 - 1.23)	(0.66 - 1.37)		(0.70 - 1.63)	(0.73 - 1.75)
	Beyond HS		0.86	1.09		1.52*	1.79**		0.49***	0.52***		0.76	0.90		1.01	1.20
			(0.61 - 1.22)	(0.75 - 1.59)		(1.08 - 2.14)	(1.26 - 2.54)		(0.35 - 0.70)	(0.37 - 0.73)		(0.53 - 1.08)	(0.61 - 1.32)		(0.65 - 1.58)	(0.75 - 1.91)
Past year cannabis use				14.65***			3.61***			2.17***			9.04***			5.37***
				(11.67 - 18.38)			(2.98 - 4.36)			(1.79 - 2.64)			(7.30 - 11.21)			(4.16 - 6.93)
Notes: Model 1= estimates without the covariates other than controlling for nesting of participants in their original communities; Model 2 = estimates controlling for the sociodemographic covariates; Model 3 = controlling also for past year cannabis use; HS = high school; numbers in parentheses are 95% confidence intervals around the odds ratios; *** p<0.001, ** p<0.01, * p<0.05.
